# Supplementary material for: Evaluation of Photocatalytic, Antioxidant, and Antibacterial Efficacy of Almond Oil Capped Zinc Oxide Nanoparticles
Source: MDPI journal article supplement (doi:10.3390/ma16145011), 2023-07-15
Supplement: s1 [file s1]

Supplementary File

# Evaluation of Photocatalytic, Antioxidant, and Antibacterial Efficacy of Almond Oil Capped Zinc Oxide Nanoparticles

Iqra Ramzan <sup>1</sup>, Mahwish Bashir <sup>1</sup>, Adnan Saeed <sup>1</sup>, Babar Shahzad Khan <sup>1,\*</sup>, Mohammed Rafi Shaik <sup>2</sup>, Merajuddin Khan <sup>2</sup>, Baji Shaik <sup>3</sup> and Mujeeb Khan <sup>2,\*</sup>

- <sup>1</sup> Department of Physics, Government College Women University, Sialkot 51310, Pakistan; ramzaniqra9@gmail.com (I.R.); mahwish.bashir@gcwus.edu.pk (M.B.); adnan.saeed@gcwus.edu.pk (A.S.)
- <sup>2</sup> Department of Chemistry, College of Science, King Saud University, P.O. Box. 2455, Riyadh 11451, Saudi Arabia; mrshaik@ksu.edu.sa (M.R.S.); mkhan3@ksu.edu.sa (M.K.)
- <sup>3</sup> School of Chemical Engineering, Yeungnam University, Gyeongsan 38541, Republic of Korea; shaikbaji@yu.ac.kr
- \* Correspondence: babar.shahzad.khan@gcwus.edu.pk (B.S.K.); kmujeeb@ksu.edu.sa (M.K.); Tel.: +966-1146-70439 (M.K.)

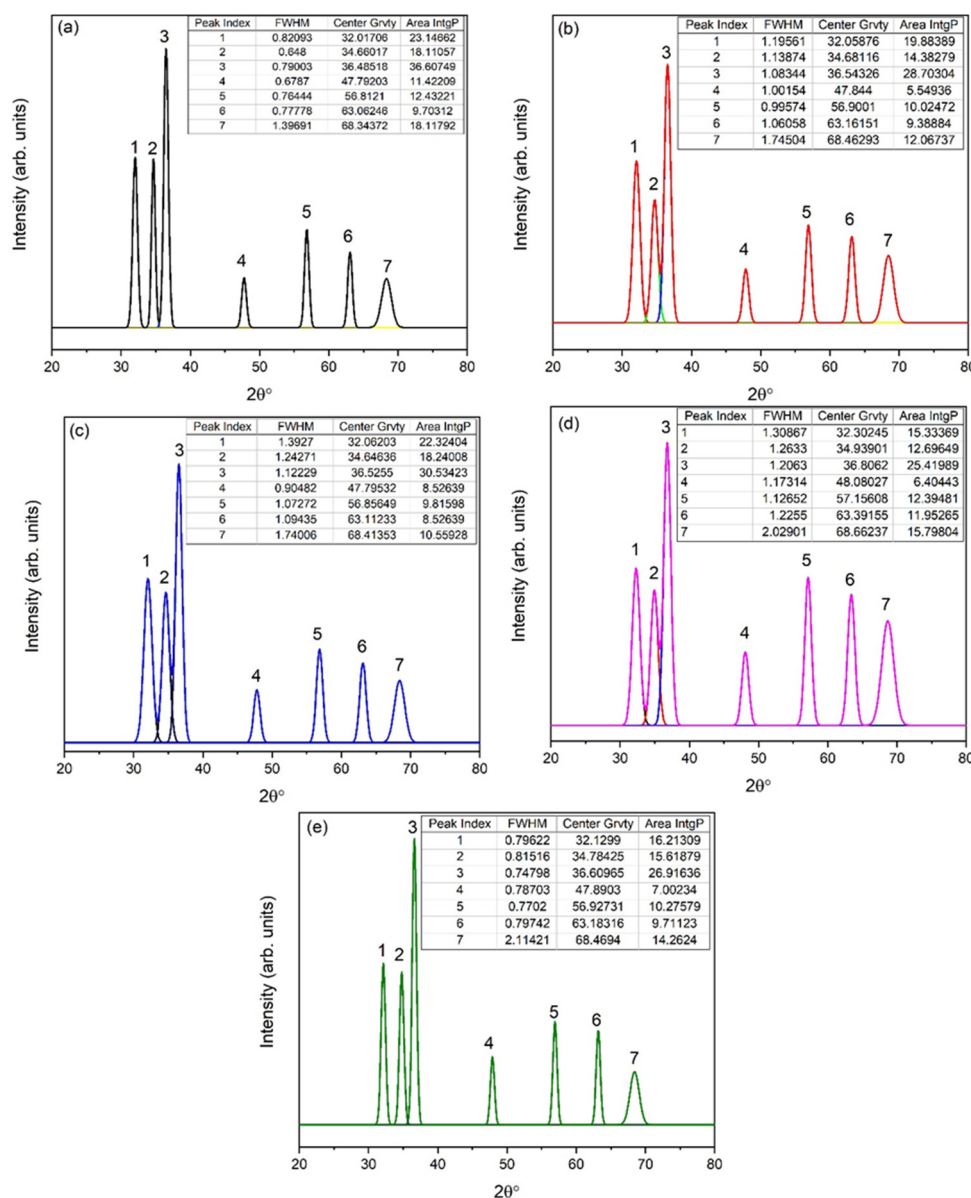

**Figure S1:** Corresponding XRD fitting diagram of hydrothermally synthesized almond oil ZnO at different molar ratios (**a**) 0.5:1, (**b**) 0.75:1, (**c**) 1:1, (**d**) 1.25:1 and (**e**) 1.5:1.
